# Supplementary material for: Islet inflammation is associated with pancreatic fatty infiltration and hyperglycemia in type 2 diabetes
Source: PubMed Central journal article supplement — BMJ Open Diabetes Res Care. 2020 Aug 11;8(1):e001508. doi: 10.1136/bmjdrc-2020-001508 (PMC7418663; doi:10.1136/bmjdrc-2020-001508), 2020-08-11

## Supplemental Information

### Supplemental figure legends

Figure S1 Correlation coefficient between CRP and parameters of age, BMI, HbA1c, FPG, CPR, C-peptide index, insulinogenic index, HOMA-IR, AUC<sub>glucose</sub> and fat-cell area. Closed circles (●), the NGT group; open circles (○), the IGT group; closed triangles (▲), the DM group.

Figure S2 Correlation coefficient between total amylase and parameters of age, BMI, HbA1c, FPG, CPR, C-peptide index, insulinogenic index, HOMA-IR, AUC<sub>glucose</sub> and fat-cell area. Closed circles (●), the NGT group; open circles (○), the IGT group; closed triangles (▲), the DM group.

## Supplemental figures

Figure S1

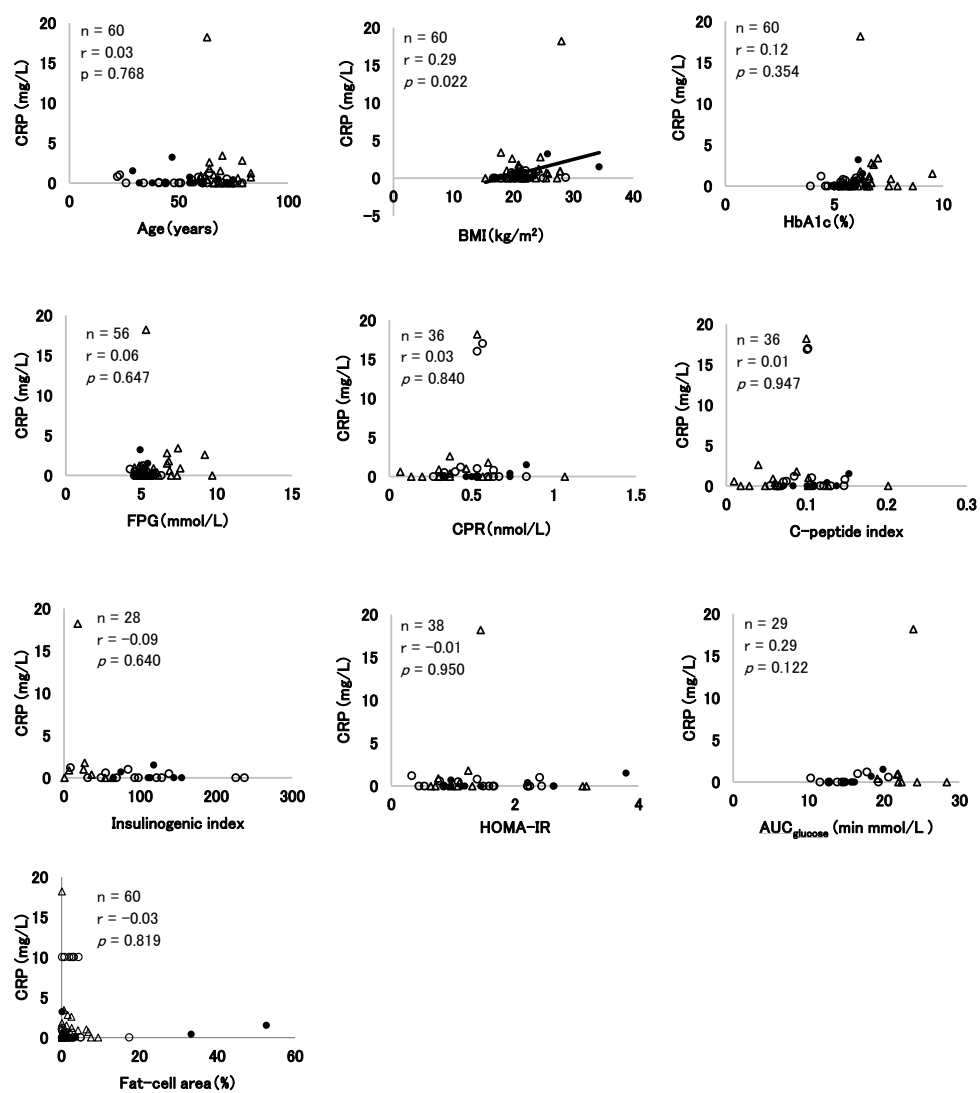

Figure S2

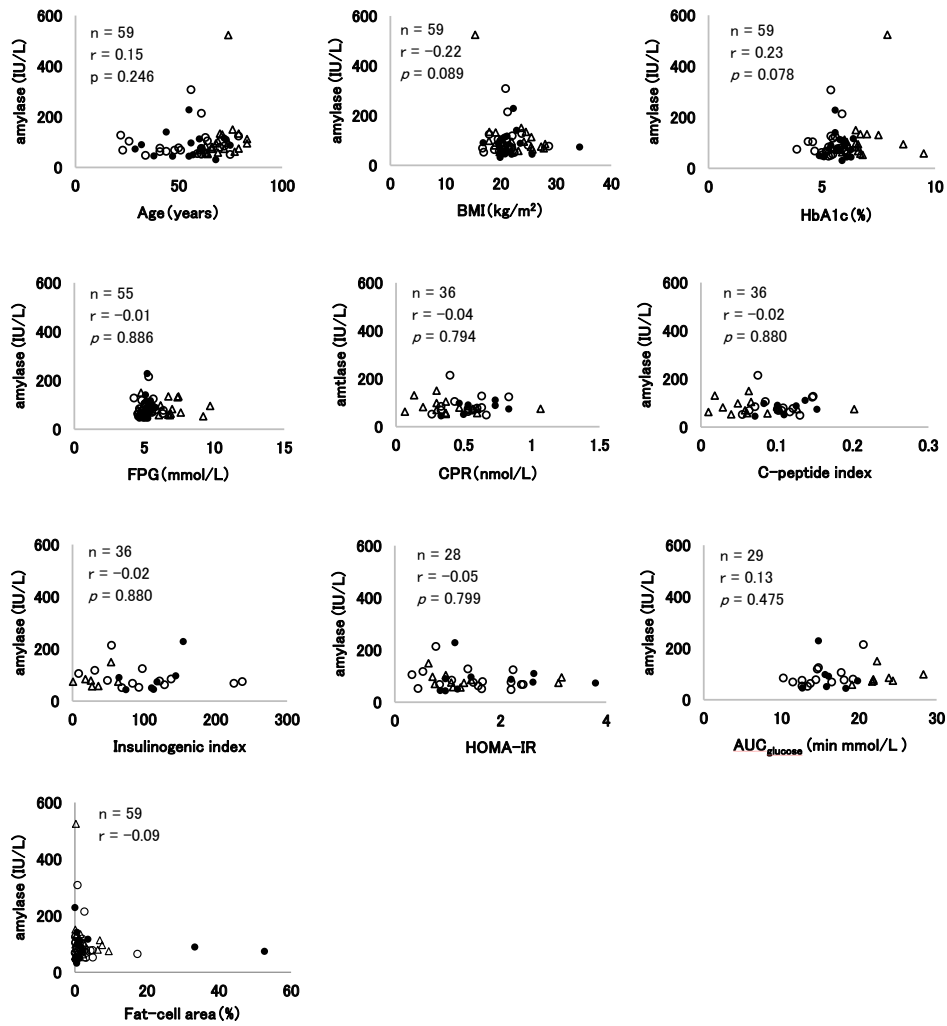

Supplement: bmjdrc-2020-001508supp001.pdf [file bmjdrc-2020-001508supp001.pdf]
